# Supplementary material for: Estimating Forest Gross Primary Production Using Machine Learning, Light Use Efficiency Model, and Global Eddy Covariance Data
Source: MDPI journal article supplement (doi:10.3390/f15091615), 2024-09-13
Supplement: s1 [file s1]

# **Estimating Forest Gross Primary Production Using Machine Learning, Light Use Efficiency Model, and Global Eddy Covariance Data**

Zhenkun Tian<sup>1</sup>, Yingying Fu<sup>2\*</sup>, Tao Zhou<sup>3,4</sup>, Chuixiang Yi<sup>5,6</sup>, Eric Kutter<sup>7</sup>, Qin Zhang<sup>8</sup>, Nir Y Krakauer<sup>9</sup>

<sup>1</sup>School of Computer Science, China University of Labor Relations, Beijing 100048, China

<sup>2</sup>School of Mathematics and Statistics, Beijing Technology and Business University, Beijing 100048, China

<sup>3</sup>State Key Laboratory of Earth Surface Processes and Resource Ecology, Beijing Normal University, Beijing 100875, China

<sup>4</sup>Key Laboratory of Environmental Change and Natural Disaster of Ministry of Education, Faculty of Geographical Science, Beijing Normal University, Beijing 100875, China

<sup>5</sup>School of Earth and Environmental Sciences, Queens College, City University of New York, Flushing, NY 11367, USA

<sup>6</sup>Earth and Environmental Sciences Department, Graduate Center, City University of New York, New York, NY 10016, USA

<sup>7</sup>Barry Commoner Center for Health and the Environment, Queens College, City University of New York, NY 11367, USA

<sup>8</sup>Institution of Water and Environment Research, Dalian University of Technology, Dalian 116024, China

<sup>9</sup>Department of Civil Engineering and NOAA-CREST, The City College of New York, New York, NY, USA

## **Contents of this file**

Figures S1 to S3

Tables S1 to S4

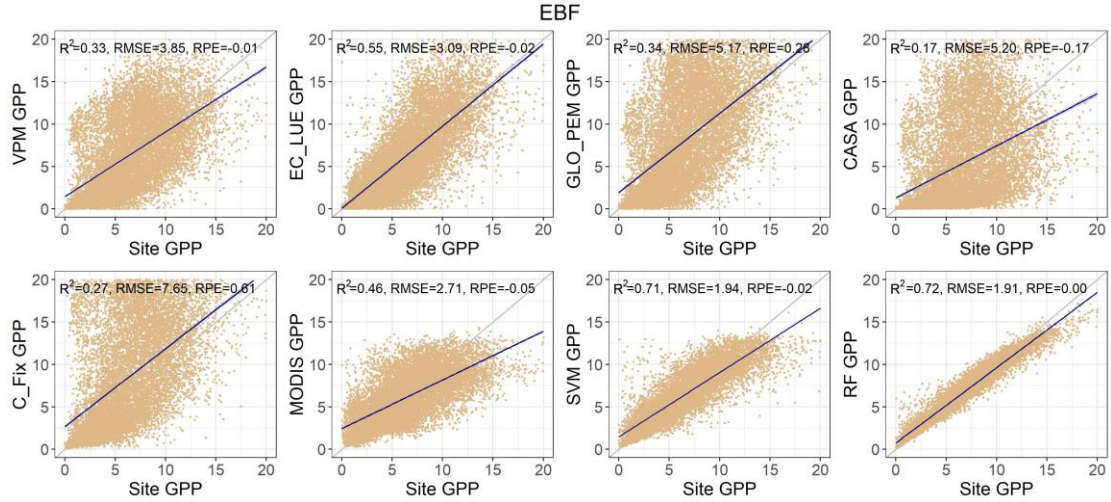

Figure S1. The scatter plots of the square of the correlation coefficients ( $R^2$ ), root mean square error (RMSE,  $\text{gC m}^{-2}\text{day}^{-1}$ ), and relative predictive error (RPE) across evergreen broadleaf forest (EBF) between daily site-derived GPP ( $\text{gC m}^{-2}\text{day}^{-1}$ ) at flux sites and the estimates from five individual models, MODIS GPP product, and machine learning methods (SVM and RF).

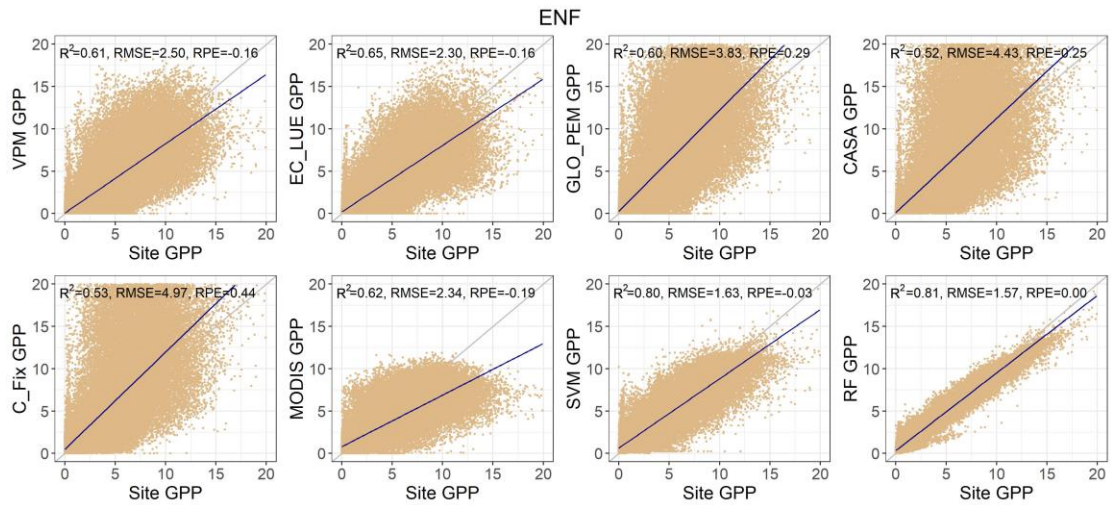

Figure S2. The scatter plots of the square of the correlation coefficients ( $R^2$ ), root mean square error (RMSE,  $\text{gC m}^{-2}\text{day}^{-1}$ ), and relative predictive error (RPE) across evergreen needleleaf forest (ENF) between daily site-derived GPP ( $\text{gC m}^{-2}\text{day}^{-1}$ ) at flux sites and the estimates from five individual models, MODIS GPP product, and machine learning methods (SVM and RF).

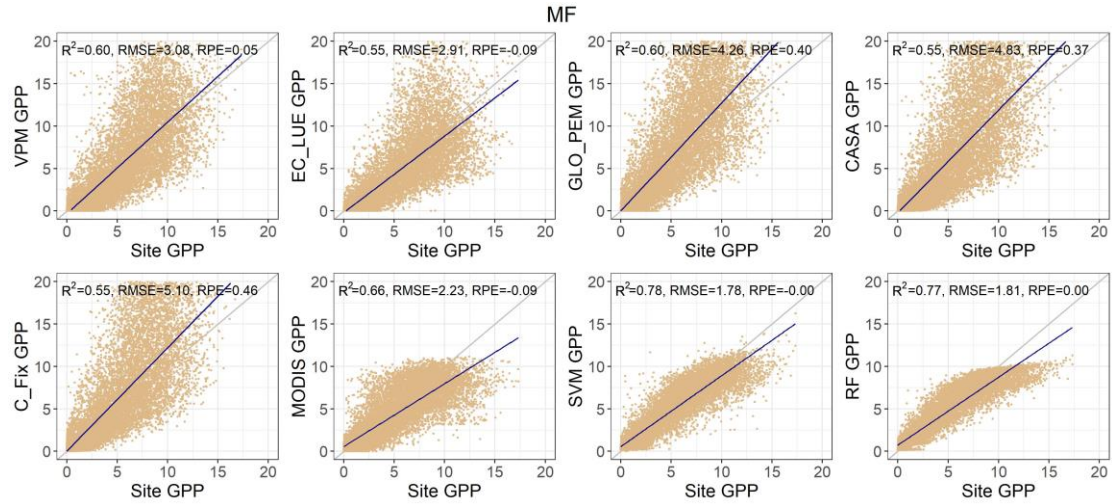

Figure S3. The scatter plots of the square of the correlation coefficients ( $R^2$ ), root mean square error (RMSE, gC m<sup>-2</sup>day<sup>-1</sup>), and relative predictive error (RPE) across mixed forest (MF) between daily site-derived GPP (gC m<sup>-2</sup>day<sup>-1</sup>) at flux sites and the estimates from five individual models, MODIS GPP product, and machine learning methods (SVM and RF).

Table S1. The information of selected 45 forest FLUXNET2015 sites.

| No | SITE_ID | Latitude | Longitude | Forest type | Observation years | Climate zone |
|----|---------|----------|-----------|-------------|-------------------|--------------|
| 1  | AU-Tum  | -35.6566 | 148.1517  | EBF         | 14                | Cfb          |
| 2  | AU-Wom  | -37.4222 | 144.0944  | EBF         | 5                 | Cfb          |
| 3  | BE-Bra  | 51.3076  | 4.5198    | MF          | 19                | Cfb          |
| 4  | BE-Vie  | 50.3049  | 5.9981    | MF          | 19                | Cfb          |
| 5  | BR-Sa3  | -3.018   | -54.9714  | EBF         | 5                 | Am           |
| 6  | CA-Gro  | 48.2167  | -82.1556  | MF          | 12                | Dfb          |
| 7  | CA-Obs  | 53.9872  | -105.1178 | ENF         | 14                | Dfc          |
| 8  | CA-Qfo  | 49.6925  | -74.3421  | ENF         | 8                 | Dfc          |
| 9  | CA-SF2  | 54.2539  | -105.8775 | ENF         | 5                 | Dfc          |
| 10 | CA-TP1  | 42.6609  | -80.5595  | ENF         | 13                | Dfb          |
| 11 | CA-TP2  | 42.7744  | -80.4588  | ENF         | 6                 | Dfb          |
| 12 | CA-TP3  | 42.7068  | -80.3483  | ENF         | 13                | Dfb          |
| 13 | CA-TP4  | 42.7102  | -80.3574  | ENF         | 13                | Dfb          |
| 14 | CH-Dav  | 46.8153  | 9.8559    | ENF         | 18                | ET           |
| 15 | DE-Hai  | 51.0792  | 10.4522   | DBF         | 13                | Cfb          |
| 16 | DE-Lkb  | 49.0996  | 13.3047   | ENF         | 5                 | Cfb          |
| 17 | DE-Lnf  | 51.3282  | 10.3678   | DBF         | 11                | Cfb          |
| 18 | DE-Obe  | 50.7867  | 13.7213   | ENF         | 7                 | Cfb          |
| 19 | DE-Tha  | 50.9626  | 13.5651   | ENF         | 19                | Cfb          |
| 20 | DK-Sor  | 55.4859  | 11.6446   | DBF         | 19                | Cfb          |
| 21 | FI-Hyy  | 61.8474  | 24.2948   | ENF         | 19                | Dfc          |
| 22 | FI-Sod  | 67.3624  | 26.6386   | ENF         | 14                | Dfc          |
| 23 | FR-LBr  | 44.7171  | -0.7693   | ENF         | 13                | Cfb          |
| 24 | FR-Pue  | 43.7413  | 3.5957    | EBF         | 15                | Csa          |
| 25 | IT-Col  | 41.8494  | 13.5881   | DBF         | 19                | Cfa          |
| 26 | IT-Cpz  | 41.7052  | 12.3761   | EBF         | 13                | Csa          |
| 27 | IT-Lav  | 45.9562  | 11.2813   | ENF         | 12                | Cfb          |
| 28 | IT-Ren  | 46.5869  | 11.4337   | ENF         | 16                | Dfc          |

| No | SITE_ID | Latitude | Longitude | Forest type | Observation years | Climate zone |
|----|---------|----------|-----------|-------------|-------------------|--------------|
| 29 | IT-Ro2  | 42.3903  | 11.9209   | DBF         | 11                | Csa          |
| 30 | IT-SRo  | 43.7279  | 10.2844   | ENF         | 14                | Csa          |
| 31 | NL-Loo  | 52.1666  | 5.7436    | ENF         | 19                | Cfb          |
| 32 | RU-Fyo  | 56.4615  | 32.9221   | ENF         | 17                | Dfb          |
| 33 | US-Blo  | 38.8953  | -120.6328 | ENF         | 11                | Csa          |
| 34 | US-GBT  | 41.3658  | -106.2397 | ENF         | 8                 | Dfc          |
| 35 | US-GLE  | 41.3665  | -106.2399 | ENF         | 11                | Dfc          |
| 36 | US-Me2  | 44.4523  | -121.5574 | ENF         | 13                | Csb          |
| 37 | US-Me4  | 44.4992  | -121.6224 | ENF         | 5                 | Csb          |
| 38 | US-Me6  | 44.3233  | -121.6078 | ENF         | 5                 | Csb          |
| 39 | US-MMS  | 39.3232  | -86.4131  | DBF         | 16                | Cfa          |
| 40 | US-NR1  | 40.0329  | -105.5464 | ENF         | 17                | Dfc          |
| 41 | US-Oho  | 41.5545  | -83.8438  | DBF         | 10                | Dfa          |
| 42 | US-Prr  | 65.1237  | -147.4876 | ENF         | 5                 | Dfc          |
| 43 | US-Syv  | 46.242   | -89.3477  | MF          | 14                | Dfb          |
| 44 | US-WCr  | 45.8059  | -90.0799  | DBF         | 16                | Dfb          |
| 45 | ZM-Mon  | -15.4391 | 23.2525   | DBF         | 10                | Aw           |

Table S2. The Köppen-Geiger climate classes.

| 1 <sup>st</sup> | 2 <sup>nd</sup> | 3 <sup>rd</sup> | Description          |
|-----------------|-----------------|-----------------|----------------------|
| A               |                 |                 | Tropical             |
|                 | f               |                 | - Rainforest         |
|                 | m               |                 | - Monsoon            |
|                 | w               |                 | - Savannah           |
| B               |                 |                 | Arid                 |
|                 | w               |                 | - Desert             |
|                 | s               |                 | - Steppe             |
|                 |                 | h               | - Hot                |
|                 |                 | k               | - Cold               |
| C               |                 |                 | Temperate            |
|                 | s               |                 | - Dry summer         |
|                 | w               |                 | - Dry winter         |
|                 | f               |                 | - Without dry season |
|                 |                 | a               | - Hot summer         |
|                 |                 | b               | - Warm summer        |
|                 |                 | c               | - Cold summer        |
| D               |                 |                 | Cold                 |
|                 | s               |                 | - Dry summer         |
|                 | w               |                 | - Dry winter         |
|                 | f               |                 | - Without dry season |
|                 |                 | a               | - Hot summer         |
|                 |                 | b               | - Warm summer        |
|                 |                 | c               | - Cold summer        |
|                 |                 | c               | - Very cold winter   |
|                 |                 |                 | Polar                |
|                 | T               |                 | - Tundra             |
|                 | F               |                 | - Frost              |

Table S3. The summary of the statistics ( $R^2$ , RMSE ( $\text{gC m}^{-2} \text{ day}^{-1}$ ), and RPE) between modeled and FLUXNET2015 GPP across the 45 forest sites.

| Sites  | CASA |      |       | C_Fix |      |       | GLO_PEM |      |       | VPM  |      |       | EC_LUE |      |       | MODIS |      |       | SVM  |      |       | RF   |      |       |
|--------|------|------|-------|-------|------|-------|---------|------|-------|------|------|-------|--------|------|-------|-------|------|-------|------|------|-------|------|------|-------|
|        | R2   | RMSE | RPE   | R2    | RMSE | RPE   | R2      | RMSE | RPE   | R2   | RMSE | RPE   | R2     | RMSE | RPE   | R2    | RMSE | RPE   | R2   | RMSE | RPE   | R2   | RMSE | RPE   |
| AU-Tum | 0.31 | 6.09 | -0.53 | 0.47  | 5.82 | 0.10  | 0.49    | 4.57 | -0.08 | 0.50 | 4.20 | -0.30 | 0.54   | 3.82 | -0.15 | 0.35  | 3.56 | -0.17 | 0.62 | 2.51 | -0.07 | 0.93 | 1.18 | -0.02 |
| AU-Wom | 0.28 | 4.54 | -0.32 | 0.52  | 6.86 | 0.54  | 0.57    | 4.79 | 0.28  | 0.59 | 3.23 | 0.03  | 0.57   | 3.58 | 0.16  | 0.52  | 2.21 | 0.11  | 0.77 | 1.64 | 0.17  | 0.94 | 0.87 | 0.10  |
| BE-Bra | 0.67 | 4.01 | 0.35  | 0.68  | 4.17 | 0.41  | 0.73    | 3.44 | 0.38  | 0.72 | 2.26 | 0.00  | 0.76   | 1.86 | -0.22 | 0.70  | 1.83 | -0.05 | 0.83 | 1.38 | 0.08  | 0.88 | 1.24 | 0.11  |
| BE-Vie | 0.64 | 3.44 | -0.05 | 0.65  | 3.61 | 0.03  | 0.71    | 3.00 | 0.02  | 0.72 | 2.56 | -0.24 | 0.73   | 2.62 | -0.35 | 0.74  | 2.41 | -0.28 | 0.88 | 1.44 | -0.10 | 0.90 | 1.37 | -0.10 |
| BR-Sa3 | 0.01 | 4.96 | 0.37  | 0.07  | 6.13 | 0.60  | 0.02    | 4.76 | 0.39  | 0.02 | 2.89 | 0.09  | 0.04   | 3.59 | 0.26  | 0.01  | 2.75 | -0.10 | 0.33 | 1.35 | -0.01 | 0.90 | 0.65 | 0.00  |
| CA-Gro | 0.72 | 4.75 | 0.65  | 0.73  | 5.08 | 0.80  | 0.79    | 3.97 | 0.63  | 0.80 | 2.58 | 0.27  | 0.84   | 1.92 | 0.13  | 0.86  | 1.34 | -0.01 | 0.90 | 1.13 | -0.04 | 0.91 | 1.15 | -0.07 |
| CA-Obs | 0.42 | 0.39 | 4.03  | 0.39  | 0.75 | 9.88  | 0.42    | 0.56 | 4.30  | 0.40 | 0.42 | 3.06  | 0.52   | 0.34 | 2.61  | 0.73  | 0.23 | 3.27  | 0.50 | 0.58 | 7.58  | 0.60 | 0.31 | 3.72  |
| CA-Qfo | 0.67 | 2.99 | 0.57  | 0.67  | 3.48 | 0.83  | 0.74    | 2.95 | 0.67  | 0.74 | 1.35 | 0.03  | 0.83   | 0.91 | -0.04 | 0.80  | 1.18 | 0.28  | 0.90 | 0.76 | 0.17  | 0.98 | 0.37 | 0.10  |
| CA-SF2 | 0.71 | 2.69 | -0.11 | 0.70  | 2.91 | -0.01 | 0.76    | 2.53 | -0.03 | 0.77 | 2.21 | -0.43 | 0.82   | 1.83 | -0.28 | 0.79  | 1.87 | -0.29 | 0.87 | 1.68 | -0.28 | 0.97 | 0.82 | -0.14 |
| CA-TP1 | 0.45 | 6.25 | 1.18  | 0.45  | 7.50 | 1.56  | 0.49    | 5.27 | 1.06  | 0.47 | 2.86 | 0.25  | 0.59   | 2.05 | 0.13  | 0.51  | 2.39 | 0.29  | 0.63 | 1.69 | 0.11  | 0.92 | 0.80 | 0.10  |
| CA-TP2 | 0.63 | 3.96 | -0.18 | 0.61  | 4.25 | -0.07 | 0.69    | 3.37 | -0.21 | 0.65 | 4.43 | -0.50 | 0.78   | 3.08 | -0.29 | 0.61  | 4.80 | -0.53 | 0.78 | 3.09 | -0.30 | 0.95 | 1.43 | -0.13 |
| CA-TP3 | 0.68 | 6.34 | 0.76  | 0.70  | 7.36 | 1.03  | 0.73    | 5.16 | 0.67  | 0.72 | 2.63 | 0.12  | 0.78   | 2.02 | 0.03  | 0.71  | 1.97 | -0.02 | 0.83 | 1.54 | 0.03  | 0.96 | 0.76 | 0.03  |
| CA-TP4 | 0.71 | 5.89 | 0.77  | 0.73  | 6.77 | 1.04  | 0.76    | 4.88 | 0.70  | 0.76 | 2.39 | 0.14  | 0.79   | 1.96 | 0.05  | 0.78  | 1.83 | 0.05  | 0.85 | 1.52 | 0.06  | 0.97 | 0.72 | 0.05  |
| CH-Dav | 0.46 | 2.67 | -0.21 | 0.49  | 2.72 | -0.07 | 0.53    | 2.82 | -0.04 | 0.54 | 2.24 | -0.36 | 0.57   | 2.21 | -0.17 | 0.65  | 1.82 | -0.26 | 0.77 | 1.20 | -0.03 | 0.94 | 0.61 | 0.00  |
| DE-Hai | 0.66 | 3.54 | 0.04  | 0.69  | 3.85 | 0.22  | 0.71    | 3.10 | 0.09  | 0.75 | 2.65 | -0.17 | 0.67   | 3.17 | -0.27 | 0.75  | 3.16 | -0.28 | 0.90 | 1.61 | 0.04  | 0.98 | 0.70 | 0.02  |
| DE-Lkb | 0.64 | 3.03 | 1.09  | 0.64  | 3.38 | 1.39  | 0.68    | 3.37 | 1.40  | 0.67 | 1.35 | 0.32  | 0.73   | 1.65 | 0.68  | 0.55  | 2.19 | 1.36  | 0.64 | 1.77 | 0.92  | 0.92 | 0.75 | 0.44  |
| DE-Lnf | 0.66 | 4.06 | 0.13  | 0.68  | 4.43 | 0.28  | 0.74    | 3.38 | 0.17  | 0.76 | 2.68 | -0.17 | 0.79   | 2.45 | -0.13 | 0.82  | 2.50 | -0.11 | 0.91 | 1.53 | 0.00  | 0.98 | 0.68 | 0.01  |
| DE-Obe | 0.67 | 3.12 | -0.23 | 0.68  | 3.10 | -0.10 | 0.75    | 2.61 | -0.15 | 0.75 | 3.03 | -0.40 | 0.77   | 2.91 | -0.38 | 0.66  | 3.47 | -0.36 | 0.88 | 1.59 | -0.04 | 0.98 | 0.72 | -0.01 |
| DE-Tha | 0.64 | 3.85 | -0.02 | 0.67  | 4.02 | 0.10  | 0.74    | 2.97 | 0.00  | 0.74 | 2.80 | -0.32 | 0.76   | 2.95 | -0.37 | 0.76  | 3.24 | -0.41 | 0.88 | 1.51 | -0.05 | 0.98 | 0.68 | -0.01 |
| DK-Sor | 0.78 | 2.94 | -0.12 | 0.77  | 3.18 | 0.01  | 0.81    | 2.67 | -0.04 | 0.83 | 3.02 | -0.30 | 0.83   | 2.91 | -0.28 | 0.84  | 3.34 | -0.28 | 0.93 | 1.60 | -0.08 | 0.99 | 0.74 | -0.03 |
| FI-Hyy | 0.71 | 3.56 | 0.23  | 0.72  | 4.15 | 0.41  | 0.77    | 3.35 | 0.31  | 0.78 | 1.92 | -0.11 | 0.85   | 1.43 | -0.13 | 0.79  | 1.59 | 0.01  | 0.92 | 1.03 | -0.05 | 0.98 | 0.47 | 0.00  |
| FI-Sod | 0.68 | 1.52 | -0.24 | 0.69  | 1.55 | -0.13 | 0.74    | 1.37 | -0.15 | 0.74 | 1.63 | -0.49 | 0.79   | 1.49 | -0.43 | 0.74  | 1.42 | -0.32 | 0.87 | 0.98 | -0.13 | 0.98 | 0.44 | -0.05 |
| FR-LBr | 0.48 | 5.42 | 0.44  | 0.54  | 5.30 | 0.52  | 0.60    | 3.97 | 0.38  | 0.60 | 2.29 | -0.19 | 0.72   | 1.79 | -0.06 | 0.60  | 2.04 | -0.16 | 0.72 | 1.57 | 0.00  | 0.95 | 0.71 | 0.01  |
| FR-Pue | 0.25 | 4.07 | 0.35  | 0.32  | 8.52 | 1.76  | 0.42    | 5.24 | 1.01  | 0.31 | 3.57 | 0.50  | 0.71   | 1.98 | 0.24  | 0.46  | 1.73 | 0.21  | 0.76 | 0.99 | 0.09  | 0.95 | 0.49 | 0.06  |

| Sites   | CASA |      |       | C_Fix |       |       | GLO_PEM |      |       | VPM  |      |       | EC_LUE |      |       | MODIS |      |       | SVM  |      |       | RF   |      |       |
|---------|------|------|-------|-------|-------|-------|---------|------|-------|------|------|-------|--------|------|-------|-------|------|-------|------|------|-------|------|------|-------|
|         | R2   | RMSE | RPE   | R2    | RMSE  | RPE   | R2      | RMSE | RPE   | R2   | RMSE | RPE   | R2     | RMSE | RPE   | R2    | RMSE | RPE   | R2   | RMSE | RPE   | R2   | RMSE | RPE   |
| IT-Col  | 0.74 | 5.23 | 0.61  | 0.74  | 6.17  | 0.83  | 0.79    | 5.51 | 0.77  | 0.81 | 2.91 | 0.27  | 0.76   | 2.73 | 0.14  | 0.63  | 2.79 | 0.11  | 0.90 | 1.48 | -0.07 | 0.98 | 0.68 | -0.01 |
| IT-Cpz  | 0.31 | 5.03 | 0.22  | 0.41  | 10.08 | 1.27  | 0.43    | 6.33 | 0.71  | 0.43 | 4.16 | 0.33  | 0.54   | 1.86 | -0.11 | 0.40  | 2.04 | 0.04  | 0.69 | 1.34 | -0.07 | 0.94 | 0.63 | -0.03 |
| IT-Lav  | 0.51 | 4.09 | -0.24 | 0.50  | 4.11  | -0.11 | 0.59    | 3.69 | -0.14 | 0.59 | 3.85 | -0.39 | 0.55   | 4.26 | -0.47 | 0.62  | 3.83 | -0.42 | 0.76 | 2.15 | -0.09 | 0.95 | 0.96 | -0.03 |
| IT-Ren  | 0.49 | 3.34 | 0.03  | 0.46  | 3.75  | 0.24  | 0.56    | 3.49 | 0.22  | 0.51 | 2.73 | -0.17 | 0.53   | 2.62 | -0.20 | 0.51  | 2.59 | -0.18 | 0.76 | 1.83 | -0.14 | 0.96 | 0.80 | -0.04 |
| IT-Ro2  | 0.62 | 6.96 | 1.01  | 0.65  | 7.14  | 1.13  | 0.65    | 4.91 | 0.75  | 0.68 | 2.67 | 0.12  | 0.79   | 2.42 | 0.17  | 0.60  | 2.84 | 0.03  | 0.87 | 1.57 | 0.00  | 0.98 | 0.69 | 0.00  |
| IT-SRo  | 0.48 | 6.97 | 0.73  | 0.54  | 7.96  | 0.95  | 0.66    | 4.80 | 0.56  | 0.61 | 2.31 | 0.04  | 0.63   | 1.93 | -0.15 | 0.59  | 1.78 | -0.08 | 0.76 | 1.33 | -0.08 | 0.96 | 0.62 | -0.03 |
| NL-Loo  | 0.72 | 3.11 | 0.07  | 0.74  | 3.53  | 0.21  | 0.80    | 2.64 | 0.13  | 0.81 | 1.98 | -0.28 | 0.84   | 1.64 | -0.21 | 0.75  | 1.96 | -0.23 | 0.90 | 1.05 | 0.03  | 0.98 | 0.49 | 0.02  |
| RU-Fyo  | 0.62 | 3.54 | 0.04  | 0.63  | 3.88  | 0.19  | 0.69    | 3.05 | 0.08  | 0.69 | 2.52 | -0.26 | 0.74   | 2.42 | -0.32 | 0.80  | 2.25 | -0.29 | 0.86 | 1.67 | -0.14 | 0.97 | 0.77 | -0.06 |
| US-Blo  | 0.51 | 7.47 | 1.13  | 0.53  | 8.33  | 1.37  | 0.58    | 6.82 | 1.16  | 0.55 | 2.94 | 0.35  | 0.64   | 3.16 | 0.43  | 0.12  | 2.50 | -0.17 | 0.76 | 1.19 | 0.09  | 0.95 | 0.59 | 0.06  |
| US-GBT  | 0.26 | 2.83 | 0.30  | 0.27  | 3.04  | 0.49  | 0.27    | 3.15 | 0.50  | 0.27 | 1.98 | -0.11 | 0.28   | 2.20 | 0.08  | 0.33  | 1.66 | -0.23 | 0.30 | 1.98 | 0.23  | 0.75 | 0.98 | 0.07  |
| US-GLE  | 0.70 | 1.51 | -0.09 | 0.71  | 1.62  | 0.10  | 0.75    | 1.61 | 0.08  | 0.75 | 1.43 | -0.34 | 0.79   | 1.22 | -0.23 | 0.80  | 1.60 | -0.40 | 0.84 | 0.98 | -0.06 | 0.96 | 0.50 | -0.02 |
| US-Me2  | 0.47 | 5.00 | 0.31  | 0.49  | 5.58  | 0.54  | 0.59    | 4.48 | 0.38  | 0.54 | 2.47 | -0.14 | 0.69   | 1.98 | -0.21 | 0.72  | 1.83 | -0.24 | 0.85 | 1.09 | -0.02 | 0.96 | 0.58 | 0.00  |
| US-Me4  | 0.08 | 6.78 | 0.47  | 0.07  | 7.38  | 0.65  | 0.07    | 6.54 | 0.58  | 0.09 | 3.74 | -0.08 | 0.09   | 2.99 | -0.18 | 0.04  | 3.06 | -0.17 | 0.02 | 2.39 | -0.04 | 0.34 | 1.15 | -0.03 |
| US-Me6  | 0.62 | 0.87 | -0.51 | 0.63  | 0.61  | -0.26 | 0.66    | 0.76 | -0.35 | 0.65 | 0.99 | -0.62 | 0.72   | 0.74 | -0.41 | 0.51  | 1.02 | -0.60 | 0.75 | 0.71 | 0.35  | 0.89 | 0.32 | 0.14  |
| US-MMS  | 0.72 | 7.21 | 0.89  | 0.75  | 6.42  | 0.90  | 0.74    | 4.33 | 0.53  | 0.79 | 2.57 | 0.10  | 0.83   | 2.82 | 0.23  | 0.67  | 3.15 | -0.12 | 0.92 | 1.45 | 0.02  | 0.98 | 0.68 | 0.01  |
| US-NR1  | 0.70 | 2.96 | 0.49  | 0.70  | 3.69  | 0.87  | 0.76    | 3.57 | 0.72  | 0.75 | 1.66 | 0.11  | 0.81   | 1.96 | 0.32  | 0.87  | 0.99 | 0.07  | 0.86 | 1.13 | 0.18  | 0.97 | 0.55 | 0.11  |
| US-Oho  | 0.81 | 5.99 | 0.63  | 0.81  | 5.71  | 0.68  | 0.81    | 3.90 | 0.41  | 0.84 | 2.23 | -0.01 | 0.91   | 2.81 | 0.25  | 0.77  | 2.92 | -0.14 | 0.96 | 1.13 | -0.01 | 0.99 | 0.55 | 0.00  |
| US-Prr  | 0.53 | 2.56 | 0.70  | 0.51  | 3.00  | 0.95  | 0.57    | 2.75 | 0.90  | 0.58 | 1.37 | 0.12  | 0.65   | 1.25 | 0.20  | 0.66  | 1.41 | 0.42  | 0.68 | 1.26 | 0.51  | 0.87 | 0.65 | 0.20  |
| US-Syv  | 0.46 | 8.18 | 1.60  | 0.44  | 8.65  | 1.79  | 0.44    | 7.53 | 1.55  | 0.44 | 5.54 | 0.97  | 0.39   | 5.62 | 0.94  | 0.43  | 3.50 | 0.37  | 0.51 | 3.07 | 0.24  | 0.64 | 2.62 | 0.17  |
| US-WCr  | 0.76 | 4.23 | 0.60  | 0.72  | 5.18  | 0.84  | 0.74    | 3.96 | 0.58  | 0.76 | 2.52 | 0.14  | 0.78   | 2.76 | 0.23  | 0.76  | 2.38 | 0.01  | 0.91 | 1.43 | 0.01  | 0.98 | 0.70 | 0.01  |
| ZM-Mon  | 0.02 | 7.75 | 1.34  | 0.11  | 7.38  | 1.37  | 0.09    | 4.92 | 0.82  | 0.00 | 3.19 | -0.12 | 0.57   | 1.84 | 0.12  | 0.46  | 1.99 | -0.06 | 0.80 | 1.17 | 0.00  | 0.97 | 0.49 | 0.00  |
| Average | 0.55 | 4.35 | 0.43  | 0.57  | 4.94  | 0.80  | 0.61    | 3.84 | 0.50  | 0.61 | 2.60 | 0.02  | 0.67   | 2.35 | 0.03  | 0.62  | 2.29 | -0.01 | 0.77 | 1.49 | 0.20  | 0.92 | 0.77 | 0.10  |

Table S4. The optimum parameters of RF and SVM across DBF, EBF, ENF, and MF.

| Forest types | RF    |      | SVM   |      |
|--------------|-------|------|-------|------|
|              | ntree | mtry | gamma | cost |
| DBF          | 250   | 4    | 0.4   | 4.5  |
| EBF          | 950   | 2    | 0.3   | 9    |
| ENF          | 400   | 3    | 0.6   | 5    |
| MF           | 750   | 1    | 0.5   | 9    |
